# Supplementary material for: Prevalence of anaphylaxis and prescription rates of epinephrine auto-injectors in urban and rural areas of Korea
Source: PubMed Central journal article supplement — Korean J Intern Med. 2018 Oct 26;34(3):643–50. doi: 10.3904/kjim.2018.094 (PMC6506728; doi:10.3904/kjim.2018.094), 2018-10-26
Supplement: kjim-2018-094-suppl1.pdf [file kjim-2018-094-suppl1.pdf]

**Supplementary Table 1. Comparison of anaphylaxis prevalence and EAI prescription rates among different regional areas in Korea over 5 years (2010 to 2014)**

|                  | Anaphylaxis prevalence,<br>/ 100,000 person-year | EAI prescription rate, % |
|------------------|--------------------------------------------------|--------------------------|
| Urban area       | 17.30                                            | 12.04                    |
| Rural area       | 28.75                                            | 3.13                     |
| Capital area     | 19.87                                            | 11.14                    |
| Non-capital area | 27.09                                            | 2.52                     |

EAI, epinephrine auto-injector.
