# Supplementary material for: Prevalence of anaphylaxis and prescription rates of epinephrine auto-injectors in urban and rural areas of Korea
Source: PubMed Central journal article supplement — Korean J Intern Med. 2018 Oct 26;34(3):643–50. doi: 10.3904/kjim.2018.094 (PMC6506728; doi:10.3904/kjim.2018.094), 2018-10-26
Supplement: kjim-2018-094-suppl2.pdf [file kjim-2018-094-suppl2.pdf]

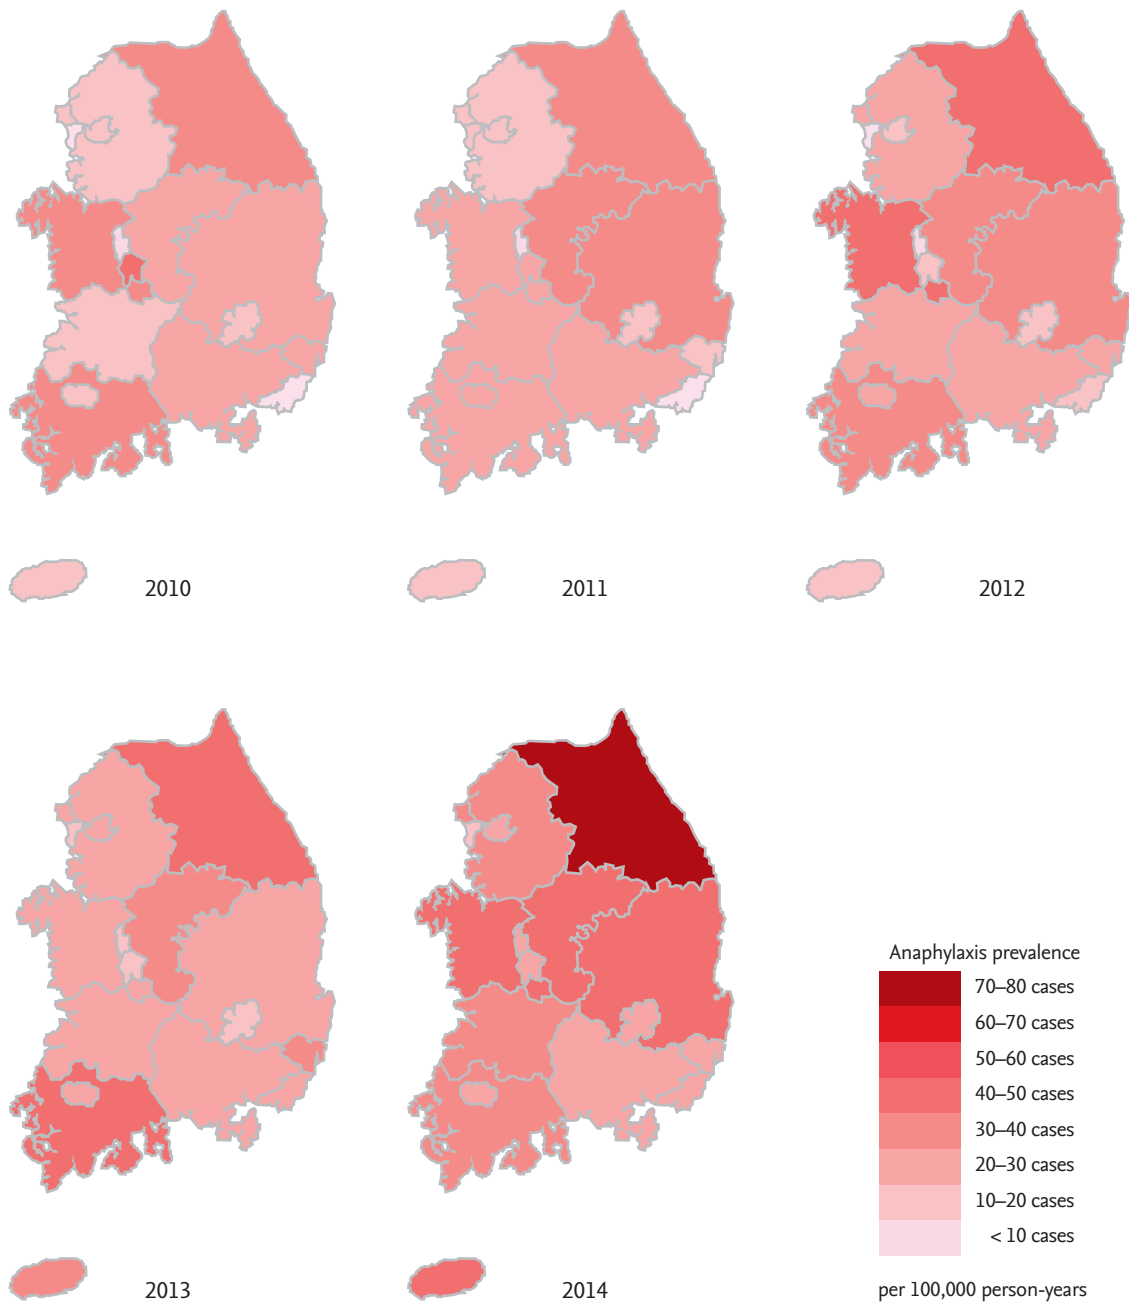

**Supplementary Figure 1.** Annual prevalence of anaphylaxis by region. The prevalence of anaphylaxis in the northeastern region (Gangwon) is increasing.
