# Supplementary material for: Prevalence of anaphylaxis and prescription rates of epinephrine auto-injectors in urban and rural areas of Korea
Source: PubMed Central journal article supplement — Korean J Intern Med. 2018 Oct 26;34(3):643–50. doi: 10.3904/kjim.2018.094 (PMC6506728; doi:10.3904/kjim.2018.094), 2018-10-26
Supplement: kjim-2018-094-suppl3.pdf [file kjim-2018-094-suppl3.pdf]

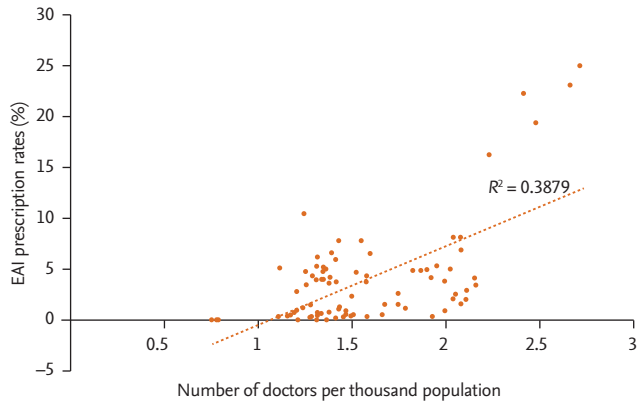

**Supplementary Figure 2.** Correlation between epinephrine auto-injector (EAI) prescription rates and the number of doctors per thousand population ( $r = 0.623$ ,  $p < 0.001$ ). Each point represents the yearly value of specific region, and there are 17 regions and 5 years.
